# Supplementary material for: Cell Surface and Functional Features of Cortical Bone Stem Cells
Source: MDPI journal article supplement (doi:10.3390/ijms222111849), 2021-10-31
Supplement: s1 [file s1]

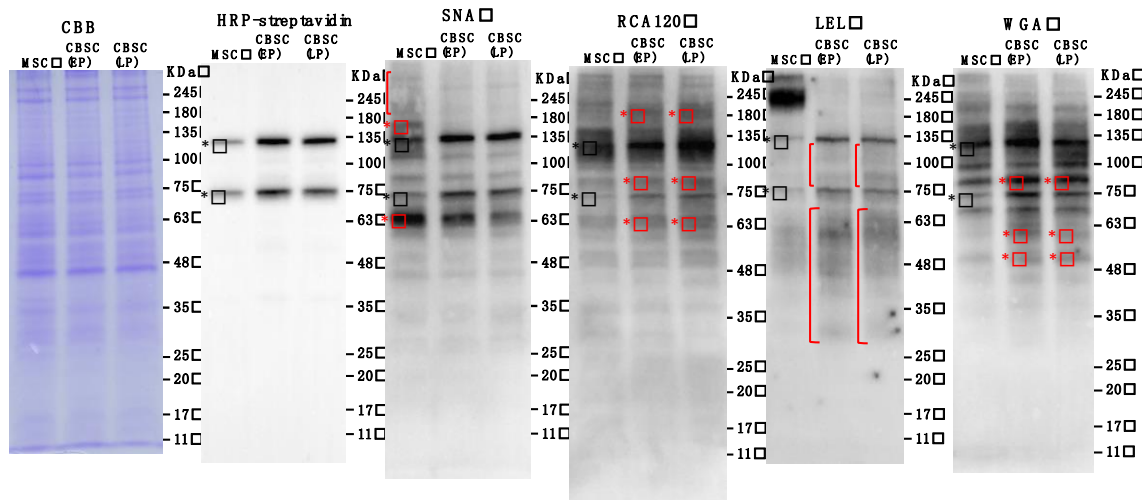

**Figure S1.** Lectin blotting analysis. Whole cell lysates from mMSCs, EP-CBSCs and LP-CBSCs, were analyzed by lectin blotting using lectins (SNA, RCA120, LEL, and WGA). Equal amounts of cell lysates were loaded. CBB staining showed that the loaded proteins were almost all equal. Black asterisk show non-specific binding proteins by HRP-streptavidin. Red asterisk and red range show decreased or increased glycan-conjugated proteins in mCBSCs compared with mMSCs. Abbreviations: mMSC, mouse mesenchymal stem cell; mCBSC, mouse cortical bone derived stem cell; EP, early passage; LP, late passage; SNA, *Sambucus nigra*; RCA120, *Ricinus communis agglutinin I*; LEL, *Lycopersicon esculentum*; WGA, *Wheat germ agglutinin*; CBB, coomassie brilliant blue.

Table S1 Antibody list

| <b>Marker</b>             | <b>Primary Antibody</b>                                                                                                                                                | <b>Negative Isotype Control</b>                                              |
|---------------------------|------------------------------------------------------------------------------------------------------------------------------------------------------------------------|------------------------------------------------------------------------------|
| Sca-1                     | Rat IgG2a anti-Sca-1-APC<br>(Miltenyi Biotec; Cologne, Germany)                                                                                                        | Rat IgG2a-APC<br>(Miltenyi Biotec; Cologne, Germany)                         |
| CD29                      | Hamster IgG anti-CD29-APC<br>(eBiosciences; San Diego, CA)                                                                                                             | Hamster IgG-APC<br>(eBiosciences; San Diego, CA)                             |
| CD34                      | Rat IgG2a anti-CD34-APC<br>(Novus Biologicals; Centennial, CO)                                                                                                         | Rat IgG2a-APC<br>(Miltenyi Biotec; Cologne, Germany)                         |
| CD45                      | Anti-CD45-APC<br>(Miltenyi Biotec; Cologne, Germany)                                                                                                                   | Isotype control-APC<br>(Miltenyi Biotec; Cologne, Germany)                   |
| C-kit                     | 1 <sup>st</sup> goat IgG anti-SCF-R<br>(R&D Systems; Minneapolis, MN)<br>2 <sup>nd</sup> anti-Goat IgG-Alexa Fluor 647<br>(Abcam, Cambridge, UK)                       | 2 <sup>nd</sup> anti-Goat IgG-Alexa Fluor 647 only<br>(Abcam, Cambridge, UK) |
| Lineage<br>Cocktail (Lin) | 1 <sup>st</sup> Biotin-Conjugated Lineage<br>Cocktail<br>(Miltenyi Biotec; Cologne, Germany)<br>2 <sup>nd</sup> anti-Biotin-APC<br>(Miltenyi Biotec; Cologne, Germany) | 2 <sup>nd</sup> anti-Biotin-APC only<br>(Miltenyi Biotec; Cologne, Germany)  |

Table S2 List of lectins for microarray

| Abbreviation         | Lectin name                        | Oligosaccharide binding specificity <sup>*1</sup>                                 |
|----------------------|------------------------------------|-----------------------------------------------------------------------------------|
| LTL                  | <i>Lotus tetragonolobus</i>        | Fuca1-3(Galb1-4)GlcNAc, Fuca1-2Galb1-4GlcNAc                                      |
| PSA                  | <i>Pisum sativum</i>               | Fuca1-6GlcNAc, a-Man                                                              |
| LCA                  | <i>Lens culinaris</i>              | Fuca1-6GlcNAc, a-Man                                                              |
| UEA-I                | <i>Ulex europaeus</i>              | Fuca1-2Galb1-4GlcNAc                                                              |
| AOL                  | <i>Aspergillus oryzae</i>          | Fuca1-6GlcNAc, Fuca1-2Galb1-4GlcNAc                                               |
| AAL                  | <i>Aleuria aurantia</i>            | Fuca1-3(Galb1-4)GlcNAc, Fuca1-6GlcNAc                                             |
| MAL-I                | <i>Maackia amurensis</i>           | Siaa2-3Galb1-4GlcNAc                                                              |
| SNA                  | <i>Sambucus nigra</i>              | Siaa2-6Gal/GalNAc                                                                 |
| SSA                  | <i>Sambucus sieboldiana</i>        | Siaa2-6Gal/GalNAc                                                                 |
| TJA-I                | <i>Trichosanthes japonica</i>      | Siaa2-6Gal/GalNAc                                                                 |
| PHA(L)               | <i>Phaseolus vulgaris</i>          | tri/tetra-antennary complex-type N-glycan                                         |
| ECA                  | <i>Erythrina cristagalli</i>       | Galb1-4GlcNAc                                                                     |
| RCA120               | <i>Ricinus communis</i>            | Galb1-4GlcNAc                                                                     |
| PHA(E)               | <i>Phaseolus vulgaris</i>          | bi-antennary complex-type N-glycan, bisecting GlcNAc                              |
| DSA                  | <i>Datura stramonium</i>           | Galb1-4GlcNAc, (GlcNAc) <sub>n</sub>                                              |
| GSL-II               | <i>Griffonia simplicifolia</i>     | agalactosylated tri/tetra antennary glycans, GlcNAc                               |
| NPA                  | <i>Narcissus pseudonarcissus</i>   | Mana1-6Man                                                                        |
| ConA                 | <i>Canavalia ensiformis</i>        | Mana1-6(Mana1-3)Man                                                               |
| GNA                  | <i>Galanthus nivalis</i>           | Mana1-3Man                                                                        |
| HHL                  | <i>Hippeastrum hybrid</i>          | Mana1-3Man, Mana1-6Man                                                            |
| ACG                  | <i>Agrocybe cylindracea</i>        | Galb1-3Gal, Siaa2-3Galb1-4Glc                                                     |
| TxLCI                | <i>Tulipa gesneriana</i>           | Mana1-3(Mana1-6)Man, bi-antennary complex-type N-glycan                           |
| BPL                  | <i>Bauhinia purpurea alba</i>      | Galb1-3GalNAc                                                                     |
| TJA-II               | <i>Trichosanthes japonica</i>      | Fuca1-2Galb                                                                       |
| EEL                  | <i>Euonymus europaeus</i>          | Gala1-3Galb1-4GlcNAc, Fuca1-2Galb1-3GlcNAc                                        |
| ABA                  | <i>Agaricus bisporus</i>           | Galb1-3GalNAc                                                                     |
| LEL                  | <i>Solanum lycopersicum</i>        | (GlcNAcb1-4) <sub>n</sub> , (Galb1-4GlcNAc) <sub>n</sub>                          |
| STL                  | <i>Solanum tuberosum</i>           | (GlcNAcb1-4) <sub>n</sub>                                                         |
| UDA                  | <i>Urtica dioica</i>               | (GlcNAcb1-4) <sub>n</sub> , High-Man                                              |
| PWM                  | <i>Phytolacca americana</i>        | (GlcNAcb1-4) <sub>n</sub>                                                         |
| Jacalin              | <i>Artocarpus integrifolia</i>     | Galb1-3GalNAc, GalNAc, GlcNAcb1-3GalNAc, Mana1-6(Mana1-3)Man                      |
| PNA                  | <i>Arachis hypogaea</i>            | Galb1-3GalNAc                                                                     |
| WFA                  | <i>Wisteria floribunda</i>         | GalNAcb1-4GlcNAc, Galb1-3GalNAc                                                   |
| ACA                  | <i>Amaranthus caudatus</i>         | Galb1-3GalNAc, Siaa2-3Galb1-3GalNAc                                               |
| MPA                  | <i>Maclura pomifera</i>            | GalNAc, Galb1-3GalNAc                                                             |
| HPA                  | <i>Helix pomatia</i>               | GalNAc                                                                            |
| VVA                  | <i>Vicia villosa</i>               | GalNAcb1-4Gal, GalNAcb1-3Gal, GalNAc                                              |
| DBA                  | <i>Dolichos biflorus</i>           | GalNAc1-3(Fuca1-2)Galb, GalNAc1-3GalNAc                                           |
| SBA                  | <i>Glycine max</i>                 | Terminal GalNAc                                                                   |
| Calsepa              | <i>Calystegia sepium</i>           | Galactosylated bi-antennary complex-type N-glycan with bisecting GlcNAc, High-Man |
| PTL-I                | <i>Psophocarpus tetragonolobus</i> | GalNAc, Gala1-3(Fuca1-2)Galb                                                      |
| MAH                  | <i>Maackia amurensis</i>           | Siaa2-3Galb1-3GalNAc                                                              |
| WGA                  | <i>Triticum vulgaris</i>           | (GlcNAcb1-4) <sub>n</sub> , Hybrid type N-glycan with bisecting GlcNAc            |
| GSL-I-A <sub>4</sub> | <i>Griffonia simplicifolia</i>     | GalNAc                                                                            |
| GSL-I-B <sub>4</sub> | <i>Griffonia simplicifolia</i>     | Gala                                                                              |

Each lectin is shown as the abbreviation, the lectin name and the main specificity on LecChip (ver. 1.0).

<sup>\*1</sup> This was modified of GlycoTechnica Ltd. web list (<https://www.glycotechnica.com/en/chip/>).
